# Supplementary material
Source: Research Square preprint supplement (doi:10.21203/rs.3.rs-8934334/v1)
Supplement: Supplementary file 1 [file b3ee57b177d845cb864a1723.docx]

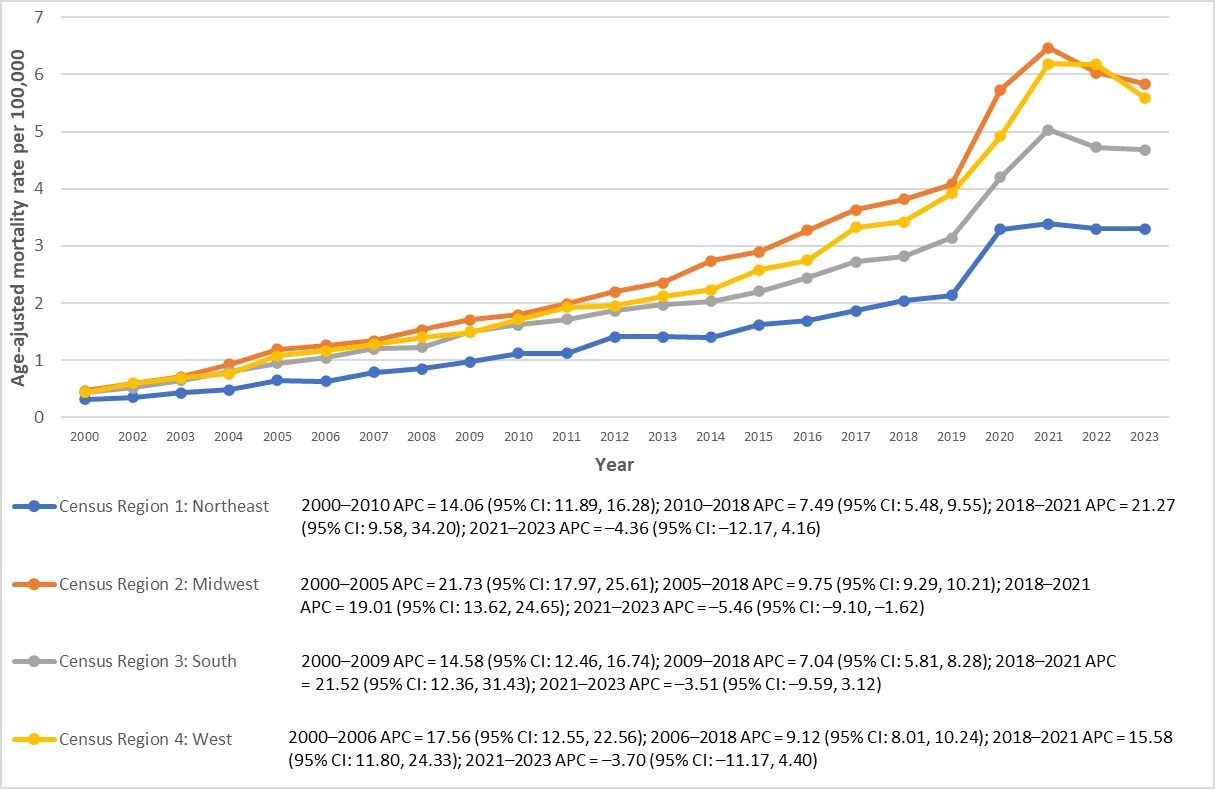


**Supplementary Figure 1.** Sleep apnea-related mortality in patients with hypertension per 100,000 stratified by census region in the United States from 2000 to 2023**.**

**
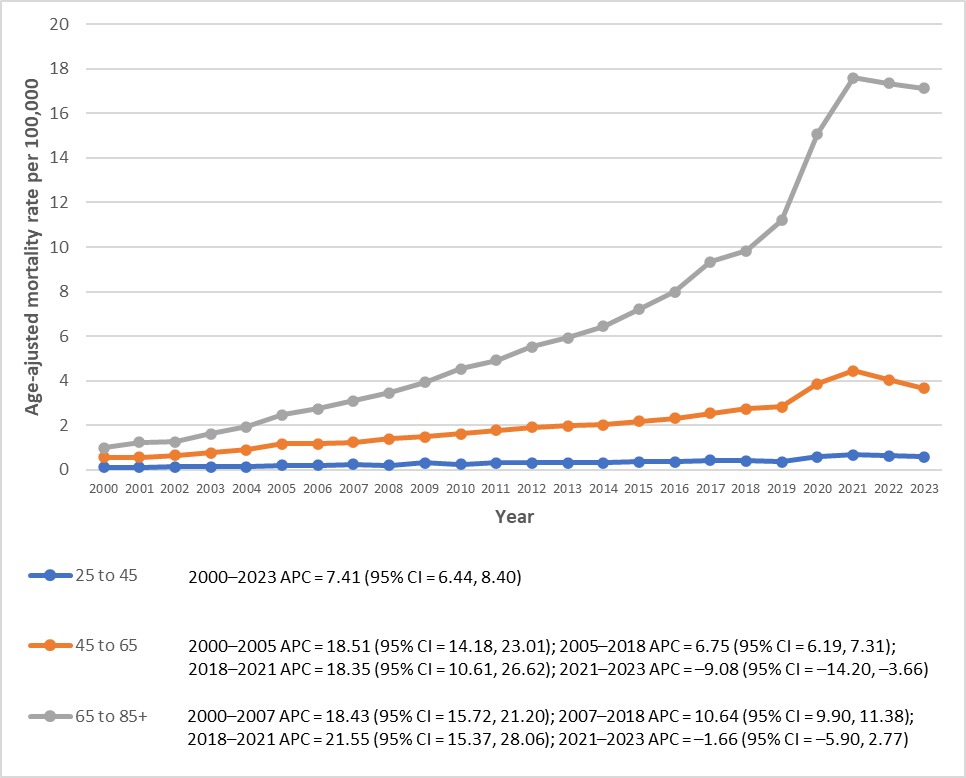
**

**Supplementary Figure 2.** Trends in Sleep apnea-related mortality in patients with Hypertention per 100,000 stratified by age group in the United States from 2000 to 2023.


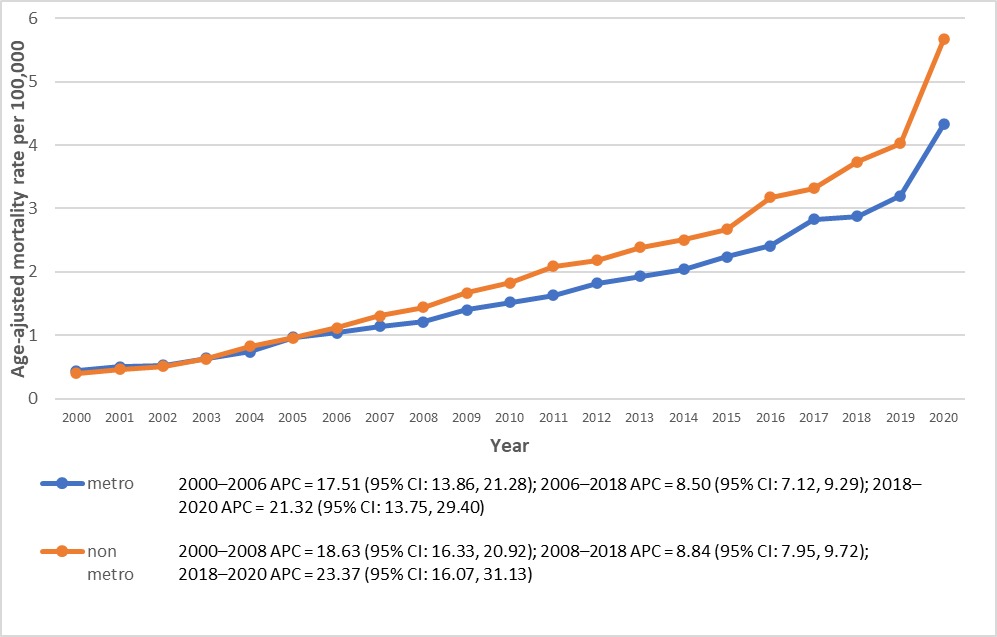


**Supplementary Figure 3.** Trends in Sleep apnea-related mortality in patients with Hypertension per 100,000, stratified by urban-rural classification in the United States from 2000 to 2023.

| **Year** | **Overall** | **Female** | **Male** | **Hispanic or Latino** | **NH American Indian** | **NH Asian** | **NH Black** | **NH White** |
| --- | --- | --- | --- | --- | --- | --- | --- | --- |
| **2000** | **766** | **275** | **491** | **26** | **N/A** | **N/A** | **164** | **561** |
| **2001** | **893** | **324** | **569** | **35** | **N/A** | **N/A** | **193** | **650** |
| **2002** | **966** | **327** | **639** | **47** | **N/A** | **N/A** | **185** | **718** |
| **2003** | **1224** | **451** | **773** | **63** | **12** | **12** | **240** | **900** |
| **2004** | **1477** | **516** | **961** | **59** | **16** | **16** | **299** | **1091** |
| **2005** | **1929** | **673** | **1256** | **83** | **16** | **20** | **355** | **1452** |
| **2006** | **2102** | **808** | **1294** | **106** | **12** | **21** | **379** | **1579** |
| **2007** | **2381** | **869** | **1512** | **139** | **15** | **29** | **410** | **1785** |
| **2008** | **2651** | **953** | **1698** | **122** | **17** | **27** | **449** | **2028** |
| **2009** | **3072** | **1101** | **1971** | **156** | **21** | **30** | **557** | **2302** |
| **2010** | **3410** | **1203** | **2207** | **170** | **14** | **39** | **563** | **2622** |
| **2011** | **3787** | **1366** | **2421** | **191** | **29** | **50** | **619** | **2897** |
| **2012** | **4248** | **1507** | **2741** | **211** | **31** | **53** | **667** | **3273** |
| **2013** | **4608** | **1591** | **3017** | **251** | **37** | **50** | **699** | **3562** |
| **2014** | **5008** | **1760** | **3248** | **265** | **35** | **62** | **729** | **3906** |
| **2015** | **5607** | **1942** | **3665** | **327** | **37** | **67** | **801** | **4357** |
| **2016** | **6253** | **2203** | **4050** | **352** | **39** | **86** | **933** | **4831** |
| **2017** | **7330** | **2550** | **4780** | **415** | **66** | **112** | **995** | **5728** |
| **2018** | **7830** | **2693** | **5137** | **407** | **59** | **88** | **1061** | **6199** |
| **2019** | **8786** | **2939** | **5847** | **478** | **67** | **128** | **1134** | **6973** |
| **2020** | **12081** | **4055** | **8026** | **828** | **96** | **190** | **1766** | **9186** |
| **2021** | **14001** | **4785** | **9216** | **844** | **111** | **167** | **1872** | **10867** |
| **2022** | **13812** | **4949** | **8863** | **762** | **89** | **174** | **1779** | **10869** |
| **2023** | **13446** | **4673** | **8773** | **730** | **87** | **148** | **1673** | **10679** |
| **Total** | **127668** | **44413** | **83255** | **7067** | **911** | **1403** | **19422** | **99015** |

**Supplementary Table 1**. Overall and sex stratified Sleep apnea-related mortality in patients with Hypertention in the United States from 2000 to 2023

| **Year** | **Medical Facility** | **Nursing Home/Long Term Care** | **Hospices** | **Home** | **Other** |
| --- | --- | --- | --- | --- | --- |
| **2000** | **399** | **64** | **0** | **272** | **24** |
| **2001** | **477** | **70** | **0** | **321** | **19** |
| **2002** | **510** | **69** | **0** | **356** | **23** |
| **2003** | **636** | **98** | **0** | **452** | **32** |
| **2004** | **736** | **137** | **0** | **551** | **49** |
| **2005** | **974** | **166** | **11** | **702** | **71** |
| **2006** | **1025** | **185** | **11** | **803** | **72** |
| **2007** | **1146** | **205** | **26** | **906** | **89** |
| **2008** | **1222** | **246** | **25** | **1027** | **95** |
| **2009** | **1392** | **275** | **51** | **1184** | **94** |
| **2010** | **1536** | **327** | **72** | **1343** | **130** |
| **2011** | **1608** | **429** | **90** | **1514** | **144** |
| **2012** | **1826** | **426** | **106** | **1713** | **176** |
| **2013** | **1838** | **483** | **112** | **1985** | **189** |
| **2014** | **1936** | **564** | **125** | **2186** | **194** |
| **2015** | **2108** | **653** | **150** | **2478** | **216** |
| **2016** | **2315** | **732** | **260** | **2717** | **229** |
| **2017** | **2557** | **832** | **358** | **3281** | **301** |
| **2018** | **2673** | **941** | **337** | **3560** | **317** |
| **2019** | **2854** | **1107** | **444** | **4020** | **360** |
| **2020** | **4351** | **1328** | **457** | **5463** | **478** |
| **2021** | **5441** | **1314** | **496** | **6175** | **575** |
| **2022** | **4635** | **1509** | **610** | **6435** | **622** |
| **2023** | **4176** | **1599** | **594** | **6402** | **675** |
| **Total** | **57351** | **15913** | **4805** | **66585** | **5655** |

**Supplementary Table 2.** Sleep apnea-related mortality in patients with Hypertention stratified by place of death in the United States from 2000 to 2023

**Crude Rate (95% CI)**

|  | **25 to 45** | **45 to 65** | **65 to 85+** |
| --- | --- | --- | --- |
| 2000 | 0.09 (0.07 - 0.11) | 0.56 (0.50 - 0.62) | 0.98 (0.88 - 1.08) |
| 2001 | 0.10 (0.08 - 0.13) | 0.56 (0.50 - 0.62) | 1.26 (1.15 - 1.38) |
| 2002 | 0.12 (0.10 - 0.15) | 0.64 (0.58 - 0.70) | 1.24 (1.12 - 1.35) |
| 2003 | 0.14 (0.12 - 0.17) | 0.78 (0.71 - 0.84) | 1.59 (1.46 - 1.72) |
| 2004 | 0.16 (0.13 - 0.19) | 0.90 (0.83 - 0.97) | 1.94 (1.80 - 2.09) |
| 2005 | 0.19 (0.16 - 0.22) | 1.18 (1.10 - 1.26) | 2.47 (2.31 - 2.63) |
| 2006 | 0.21 (0.18 - 0.24) | 1.19 (1.11 - 1.27) | 2.77 (2.60 - 2.94) |
| 2007 | 0.26 (0.22 - 0.29) | 1.29 (1.21 - 1.37) | 3.10 (2.93 - 3.28) |
| 2008 | 0.23 (0.20 - 0.26) | 1.44 (1.36 - 1.53) | 3.42 (3.24 - 3.60) |
| 2009 | 0.30 (0.26 - 0.34) | 1.57 (1.48 - 1.65) | 3.95 (3.76 - 4.15) |
| 2010 | 0.28 (0.24 - 0.31) | 1.67 (1.58 - 1.75) | 4.53 (4.32 - 4.74) |
| 2011 | 0.30 (0.26 - 0.33) | 1.84 (1.75 - 1.93) | 4.88 (4.66 - 5.09) |
| 2012 | 0.31 (0.27 - 0.34) | 1.99 (1.89 - 2.08) | 5.44 (5.22 - 5.66) |
| 2013 | 0.30 (0.26 - 0.34) | 2.11 (2.01 - 2.21) | 5.83 (5.61 - 6.05) |
| 2014 | 0.34 (0.30 - 0.37) | 2.16 (2.06 - 2.26) | 6.31 (6.09 - 6.54) |
| 2015 | 0.34 (0.31 - 0.38) | 2.31 (2.21 - 2.42) | 7.06 (6.82 - 7.30) |
| 2016 | 0.36 (0.32 - 0.40) | 2.49 (2.39 - 2.60) | 7.80 (7.56 - 8.05) |
| 2017 | 0.40 (0.36 - 0.44) | 2.77 (2.66 - 2.88) | 9.14 (8.87 - 9.40) |
| 2018 | 0.35 (0.31 - 0.39) | 2.97 (2.85 - 3.09) | 9.60 (9.34 - 9.87) |
| 2019 | 0.35 (0.31 - 0.39) | 3.13 (3.01 - 3.25) | 10.87 (10.59 - 11.15) |
| 2020 | 0.54 (0.49 - 0.59) | 4.21 (4.07 - 4.35) | 14.59 (14.27 - 14.91) |
| 2021 | 0.65 (0.59 - 0.70) | 4.89 (4.74 - 5.04) | 16.73 (16.39 - 17.06) |
| 2022 | 0.60 (0.54 - 0.65) | 4.46 (4.31 - 4.60) | 16.62 (16.28 - 16.95) |
| 2023 | 0.53 (0.48 - 0.58) | 4.03 (3.90 - 4.17) | 16.28 (15.96 - 16.61) |
| Total | 0.27 (0.26 - 0.28) | 1.87 (1.85 - 1.89) | 5.72 (5.67 - 5.77) |

**Supplementary Table 3**  Sleep apnea-related mortality in patients with Hypertention Crude Rate per 100,000 stratified by Age Group in the United States from 2000 to 2023.

| **Year** | **Overall (95% CI)** | **Female (95% CI)** | **Male (95% CI)** |
| --- | --- | --- | --- |
| 2000 | 0.44 (0.41 - 0.47) | 0.28 (0.24 - 0.31) | 0.60 (0.55 - 0.65) |
| 2001 | 0.48 (0.45 - 0.51) | 0.31 (0.27 - 0.34) | 0.71 (0.65 - 0.76) |
| 2002 | 0.54 (0.51 - 0.58) | 0.31 (0.28 - 0.35) | 0.73 (0.67 - 0.78) |
| 2003 | 0.65 (0.61 - 0.68) | 0.43 (0.39 - 0.47) | 0.90 (0.83 - 0.96) |
| 2004 | 0.76 (0.72 - 0.80) | 0.48 (0.44 - 0.53) | 1.11 (1.04 - 1.18) |
| 2005 | 0.99 (0.94 - 1.03) | 0.62 (0.57 - 0.67) | 1.40 (1.32 - 1.48) |
| 2006 | 1.04 (0.99 - 1.08) | 0.75 (0.69 - 0.80) | 1.41 (1.33 - 1.49) |
| 2007 | 1.16 (1.11 - 1.21) | 0.77 (0.72 - 0.82) | 1.62 (1.54 - 1.71) |
| 2008 | 1.25 (1.20 - 1.30) | 0.82 (0.76 - 0.87) | 1.79 (1.70 - 1.87) |
| 2009 | 1.43 (1.38 - 1.48) | 0.95 (0.89 - 1.01) | 2.02 (1.93 - 2.11) |
| 2010 | 1.57 (1.52 - 1.62) | 1.02 (0.96 - 1.08) | 2.23 (2.14 - 2.32) |
| 2011 | 1.71 (1.66 - 1.77) | 1.12 (1.06 - 1.18) | 2.42 (2.33 - 2.52) |
| 2012 | 1.88 (1.82 - 1.94) | 1.20 (1.14 - 1.26) | 2.67 (2.57 - 2.77) |
| 2013 | 1.99 (1.93 - 2.05) | 1.25 (1.19 - 1.31) | 2.88 (2.78 - 2.98) |
| 2014 | 2.10 (2.04 - 2.16) | 1.35 (1.29 - 1.41) | 3.04 (2.93 - 3.14) |
| 2015 | 2.33 (2.27 - 2.39) | 1.47 (1.40 - 1.54) | 3.38 (3.27 - 3.49) |
| 2016 | 2.53 (2.46 - 2.59) | 1.64 (1.57 - 1.71) | 3.63 (3.52 - 3.75) |
| 2017 | 2.89 (2.82 - 2.96) | 1.86 (1.78 - 1.93) | 4.20 (4.07 - 4.32) |
| 2018 | 3.06 (2.99 - 3.13) | 1.90 (1.83 - 1.97) | 4.41 (4.28 - 4.53) |
| 2019 | 3.34 (3.27 - 3.41) | 2.01 (1.94 - 2.09) | 4.95 (4.82 - 5.08) |
| 2020 | 4.54 (4.46 - 4.62) | 2.76 (2.67 - 2.84) | 6.66 (6.51 - 6.81) |
| 2021 | 5.29 (5.20 - 5.38) | 3.32 (3.22 - 3.41) | 7.65 (7.49 - 7.81) |
| 2022 | 5.07 (4.98 - 5.16) | 3.31 (3.21 - 3.40) | 7.21 (7.06 - 7.36) |
| 2023 | 4.87 (4.79 - 4.96) | 3.05 (2.96 - 3.14) | 7.05 (6.90 - 7.20) |
| **Total** | **1.86 (1.85 - 1.87)** | **1.18 (1.17 - 1.20)** | **2.71 (2.69 - 2.74)** |

**Supplementary Table 4** Sleep apnea-related mortality in patients with Hypertention AMMR per 100,000 stratified by race in the United States from 2000 to 2023.

| **Year** | **Hispanic (95% CI)** | **NH American Indian (95% CI)** | **NH Asian (95% CI)** | **NH Black (95% CI)** | **NH White (95% CI)** |
| --- | --- | --- | --- | --- | --- |
| 2000 | 0.21 (0.14 - 0.31) | N/A | N/A | 0.91 (0.77 - 1.05) | 0.37 (0.34 - 0.41) |
| 2001 | 0.29 (0.20 - 0.41) | N/A | N/A | 1.09 (0.93 - 1.24) | 0.43 (0.39 - 0.46) |
| 2002 | 0.34 (0.24 - 0.46) | N/A | N/A | 0.98 (0.83 - 1.12) | 0.45 (0.42 - 0.49) |
| 2003 | 0.48 (0.36 - 0.62) | Unreliable (0.71 - 2.17) | 0.30 (0.09 - 0.31) | 1.24 (1.08 - 1.40) | 0.60 (0.56 - 0.64) |
| 2004 | 0.43 (0.32 - 0.56) | Unreliable (0.46 - 1.66) | 0.30 (0.16 - 0.47) | 1.51 (1.33 - 1.68) | 0.72 (0.67 - 0.76) |
| 2005 | 0.52 (0.40 - 0.66) | Unreliable (0.46 - 1.66) | 0.30 (0.18 - 0.47) | 1.75 (1.57 - 1.94) | 0.93 (0.88 - 0.98) |
| 2006 | 0.66 (0.53 - 0.80) | Unreliable (0.46 - 1.66) | 0.30 (0.18 - 0.47) | 1.85 (1.66 - 2.04) | 0.99 (0.94 - 1.04) |
| 2007 | 0.78 (0.64 - 0.92) | Unreliable (0.58 - 1.88) | 0.39 (0.26 - 0.57) | 1.94 (1.74 - 2.13) | 1.12 (1.07 - 1.17) |
| 2008 | 0.71 (0.57 - 0.84) | Unreliable (0.69 - 1.97) | 0.29 (0.19 - 0.43) | 2.07 (1.87 - 2.26) | 1.27 (1.21 - 1.32) |
| 2009 | 0.82 (0.69 - 0.96) | 1.77 (1.05 - 2.80) | 0.34 (0.23 - 0.50) | 2.58 (2.36 - 2.80) | 1.44 (1.38 - 1.50) |
| 2010 | 0.92 (0.77 - 1.07) | Unreliable (0.54 - 1.81) | 0.39 (0.28 - 0.54) | 2.51 (2.30 - 2.73) | 1.56 (1.50 - 1.62) |
| 2011 | 0.94 (0.80 - 1.08) | 1.94 (1.26 - 2.87) | 0.51 (0.37 - 0.68) | 2.73 (2.51 - 2.95) | 1.71 (1.65 - 1.78) |
| 2012 | 1.00 (0.86 - 1.14) | 2.13 (1.41 - 3.08) | 0.48 (0.36 - 0.64) | 2.85 (2.63 - 3.07) | 1.91 (1.84 - 1.97) |
| 2013 | 1.17 (1.01 - 1.32) | 2.30 (1.60 - 3.22) | 0.44 (0.32 - 0.59) | 2.91 (2.68 - 3.13) | 2.05 (1.98 - 2.12) |
| 2014 | 1.15 (1.01 - 1.30) | 2.20 (1.52 - 3.09) | 0.57 (0.43 - 0.73) | 2.95 (2.73 - 3.17) | 2.20 (2.13 - 2.27) |
| 2015 | 1.39 (1.24 - 1.55) | 2.34 (1.62 - 3.26) | 0.57 (0.44 - 0.72) | 3.22 (2.99 - 3.45) | 2.41 (2.34 - 2.48) |
| 2016 | 1.40 (1.25 - 1.55) | 2.42 (1.69 - 3.35) | 0.72 (0.58 - 0.90) | 3.61 (3.37 - 3.85) | 2.63 (2.55 - 2.70) |
| 2017 | 1.63 (1.47 - 1.80) | 3.98 (3.05 - 5.12) | 0.89 (0.72 - 1.06) | 3.83 (3.58 - 4.07) | 3.07 (2.99 - 3.15) |
| 2018 | 1.57 (1.41 - 1.73) | 3.49 (2.64 - 4.53) | 0.67 (0.54 - 0.83) | 3.92 (3.67 - 4.16) | 3.23 (3.15 - 3.31) |
| 2019 | 1.72 (1.56 - 1.88) | 3.73 (2.86 - 4.77) | 0.95 (0.79 - 1.12) | 4.11 (3.86 - 4.35) | 3.55 (3.46 - 3.63) |
| 2020 | 2.83 (2.63 - 3.03) | 5.46 (4.40 - 6.71) | 1.33 (1.14 - 1.52) | 6.23 (5.93 - 6.53) | 4.70 (4.60 - 4.80) |
| 2021 | 2.81 (2.61 - 3.01) | 6.56 (5.30 - 7.81) | 1.22 (1.03 - 1.40) | 6.75 (6.43 - 7.06) | 5.65 (5.54 - 5.76) |
| 2022 | 2.53 (2.34 - 2.72) | 5.49 (4.39 - 6.79) | 1.22 (1.04 - 1.41) | 6.31 (6.01 - 6.61) | 5.52 (5.41 - 5.63) |
| 2023 | 2.33 (2.16 - 2.51) | 4.97 (3.96 - 6.16) | 1.01 (0.84 - 1.17) | 5.77 (5.48 - 6.05) | 5.38 (5.27 - 5.48) |
| **Total** | **1.16 (1.12 - 1.19)** | **2.15 (1.97 - 2.33)** | **0.55 (0.52 - 0.58)** | **2.79 (2.74 - 2.84)** | **1.87 (1.85 - 1.88)** |

**Supplementary Table 5.** Overall and sex-stratified Sleep apnea-related mortality in patients with Hypertention per 100,000 in the United States from 2000 to 2023.

| **Age-Adjusted Rate (95% CI)** | | |
| --- | --- | --- |
| **Year** | **Metropolitan** | **Nonmetropolitan** |
| 2000 | 0.44 (0.40 - 0.47) | 0.40 (0.33 - 0.47) |
| 2001 | 0.50 (0.46 - 0.53) | 0.46 (0.38 - 0.53) |
| 2002 | 0.53 (0.49 - 0.56) | 0.51 (0.43 - 0.59) |
| 2003 | 0.64 (0.60 - 0.68) | 0.63 (0.55 - 0.72) |
| 2004 | 0.74 (0.70 - 0.78) | 0.83 (0.73 - 0.92) |
| 2005 | 0.97 (0.92 - 1.01) | 0.96 (0.85 - 1.06) |
| 2006 | 1.04 (0.99 - 1.09) | 1.12 (1.01 - 1.24) |
| 2007 | 1.14 (1.09 - 1.19) | 1.31 (1.19 - 1.43) |
| 2008 | 1.21 (1.15 - 1.26) | 1.44 (1.31 - 1.56) |
| 2009 | 1.40 (1.34 - 1.46) | 1.67 (1.54 - 1.81) |
| 2010 | 1.52 (1.46 - 1.57) | 1.83 (1.69 - 1.97) |
| 2011 | 1.63 (1.57 - 1.69) | 2.09 (1.94 - 2.23) |
| 2012 | 1.82 (1.75 - 1.88) | 2.18 (2.03 - 2.34) |
| 2013 | 1.93 (1.87 - 2.00) | 2.39 (2.23 - 2.55) |
| 2014 | 2.04 (1.97 - 2.10) | 2.51 (2.35 - 2.67) |
| 2015 | 2.24 (2.18 - 2.31) | 2.67 (2.51 - 2.83) |
| 2016 | 2.41 (2.34 - 2.48) | 3.18 (2.99 - 3.36) |
| 2017 | 2.83 (2.75 - 2.90) | 3.32 (3.13 - 3.50) |
| 2018 | 2.88 (2.81 - 2.95) | 3.74 (3.55 - 3.93) |
| 2019 | 3.20 (3.12 - 3.27) | 4.03 (3.83 - 4.23) |
| 2020 | 4.33 (4.24 - 4.41) | 5.67 (5.44 - 5.90) |

**Supplementary Table 6.**  Sleep apnea-related mortality in patients with Hypertention AAMR per 100,000 stratified by urban-rural classification in the United States from 2000 to 2020.

|  | **Age-Adjusted Rate (95% CI)** |
| --- | --- |
| **Alabama** | 1.29 (1.20-1.37) |
| **Alaska** | 2.27 (1.91-2.63) |
| **Arizona** | 1.35 (1.27-1.42) |
| **Arkansas** | 1.58 (1.47-1.70) |
| **California** | 1.73 (1.70-1.77) |
| **Colorado** | 3.16 (3.03-3.30) |
| **Connecticut** | 0.98 (0.89-1.06) |
| **Delaware** | 2.57 (2.30-2.83) |
| **District of Columbia** | 1.97 (1.67-2.28) |
| **Florida** | 1.38 (1.34-1.42) |
| **Georgia** | 1.27 (1.21-1.34) |
| **Hawaii** | 1.93 (1.74-2.11) |
| **Idaho** | 2.69 (2.47-2.90) |
| **Illinois** | 1.51 (1.46-1.57) |
| **Indiana** | 2.34 (2.24-2.44) |
| **Iowa** | 3.02 (2.87-3.18) |
| **Kansas** | 1.81 (1.68-1.94) |
| **Kentucky** | 1.91 (1.80-2.02) |
| **Louisiana** | 1.38 (1.29-1.48) |
| **Maine** | 1.79 (1.62-1.96) |
| **Maryland** | 2.03 (1.93-2.13) |
| **Massachusetts** | 0.89 (0.84-0.95) |
| **Michigan** | 1.44 (1.38-1.50) |
| **Minnesota** | 3.50 (3.37-3.63) |
| **Mississippi** | 1.56 (1.44-1.68) |
| **Missouri** | 1.99 (1.90-2.08) |
| **Montana** | 3.19 (2.91-3.46) |
| **Nebraska** | 3.09 (2.89-3.30) |
| **Nevada** | 1.11 (1.00-1.22) |
| **New Hampshire** | 1.69 (1.51-1.86) |
| **New Jersey** | 1.40 (1.33-1.46) |
| **New Mexico** | 1.49 (1.36-1.63) |
| **New York** | 0.80 (0.76-0.83) |
| **North Carolina** | 2.49 (2.41-2.57) |
| **North Dakota** | 2.11 (1.83-2.39) |
| **Ohio** | 2.86 (2.79-2.94) |
| **Oklahoma** | 2.82 (2.68-2.96) |
| **Oregon** | 3.95 (3.79-4.11) |
| **Pennsylvania** | 1.79 (1.73-1.84) |
| **Rhode Island** | 2.05 (1.83-2.27) |
| **South Carolina** | 2.31 (2.20-2.42) |
| **South Dakota** | 3.49 (3.16-3.81) |
| **Tennessee** | 2.53 (2.43-2.63) |
| **Texas** | 1.99 (1.94-2.04) |
| **Utah** | 2.45 (2.27-2.63) |
| **Vermont** | 2.44 (2.14-2.74) |
| **Virginia** | 1.74 (1.66-1.82) |
| **Washington** | 3.02 (2.91-3.13) |
| **West Virginia** | 1.96 (1.80-2.11) |
| **Wisconsin** | 2.23 (2.13-2.33) |
| **Wyoming** | 3.83 (3.40-4.26) |

**Supplementary Table 7.**  Sleep apnea-related mortality in patients with Hypertention per 100,000 stratified by state in the United States from 2000 to 2020.

| **Census Region** | **Year** | **Age-Adjusted Rate (95% CI)** |
| --- | --- | --- |
| Census Region 1: Northeast | **2000** | 0.32 (0.26-0.38) |
| Census Region 1: Northeast | **2001** | 0.34 (0.28-0.40) |
| Census Region 1: Northeast | **2002** | 0.35 (0.29-0.41) |
| Census Region 1: Northeast | **2003** | 0.43 (0.36-0.49) |
| Census Region 1: Northeast | **2004** | 0.48 (0.41-0.55) |
| Census Region 1: Northeast | **2005** | 0.65 (0.57-0.73) |
| Census Region 1: Northeast | **2006** | 0.63 (0.55-0.71) |
| Census Region 1: Northeast | **2007** | 0.79 (0.70-0.87) |
| Census Region 1: Northeast | **2008** | 0.85 (0.76-0.94) |
| Census Region 1: Northeast | **2009** | 0.97 (0.88-1.07) |
| Census Region 1: Northeast | **2010** | 1.12 (1.01-1.22) |
| Census Region 1: Northeast | **2011** | 1.12 (1.02-1.22) |
| Census Region 1: Northeast | **2012** | 1.41 (1.29-1.52) |
| Census Region 1: Northeast | **2013** | 1.41 (1.30-1.53) |
| Census Region 1: Northeast | **2014** | 1.40 (1.29-1.51) |
| Census Region 1: Northeast | **2015** | 1.62 (1.50-1.74) |
| Census Region 1: Northeast | **2016** | 1.69 (1.56-1.81) |
| Census Region 1: Northeast | **2017** | 1.87 (1.74-2.00) |
| Census Region 1: Northeast | **2018** | 2.04 (1.91-2.17) |
| Census Region 1: Northeast | **2019** | 2.14 (2.01-2.28) |
| Census Region 1: Northeast | **2020** | 3.29 (3.13-3.46) |
| Census Region 1: Northeast | **2021** | 3.39 (3.23-3.56) |
| Census Region 1: Northeast | **2022** | 3.30 (3.14-3.46) |
| Census Region 1: Northeast | **2023** | 3.30 (3.14-3.46) |
| **Total (2000-2023)** |  | **1.87 (1.84-1.90)** |
| **Census Region 2: Midwest** | **2000** | 0.47 (0.40-0.53) |
| Census Region 2: Midwest | **2001** | 0.52 (0.45-0.59) |
| Census Region 2: Midwest | **2002** | 0.59 (0.52-0.67) |
| Census Region 2: Midwest | **2003** | 0.71 (0.63-0.78) |
| Census Region 2: Midwest | **2004** | 0.93 (0.84-1.02) |
| Census Region 2: Midwest | **2005** | 1.19 (1.08-1.29) |
| Census Region 2: Midwest | **2006** | 1.26 (1.16-1.37) |
| Census Region 2: Midwest | **2007** | 1.34 (1.23-1.44) |
| Census Region 2: Midwest | **2008** | 1.53 (1.42-1.65) |
| Census Region 2: Midwest | **2009** | 1.71 (1.59-1.83) |
| Census Region 2: Midwest | **2010** | 1.80 (1.68-1.92) |
| Census Region 2: Midwest | **2011** | 1.99 (1.87-2.12) |
| Census Region 2: Midwest | **2012** | 2.20 (2.07-2.33) |
| Census Region 2: Midwest | **2013** | 2.36 (2.23-2.50) |
| Census Region 2: Midwest | **2014** | 2.74 (2.59-2.88) |
| Census Region 2: Midwest | **2015** | 2.90 (2.75-3.05) |
| Census Region 2: Midwest | **2016** | 3.27 (3.11-3.43) |
| Census Region 2: Midwest | **2017** | 3.63 (3.46-3.79) |
| Census Region 2: Midwest | **2018** | 3.82 (3.65-3.99) |
| Census Region 2: Midwest | **2019** | 4.08 (3.91-4.25) |
| Census Region 2: Midwest | **2020** | 5.73 (5.53-5.93) |
| Census Region 2: Midwest | **2021** | 6.47 (6.26-6.69) |
| Census Region 2: Midwest | **2022** | 6.03 (5.82-6.23) |
| Census Region 2: Midwest | **2023** | 5.84 (5.64-6.04) |
| **Total (2000-2023)** |  | **3.23 (3.18-3.27)** |
| **Census Region 3: South** | **2000** | 0.44 (0.38-0.49) |
| Census Region 3: South | **2001** | 0.47 (0.42-0.52) |
| Census Region 3: South | **2002** | 0.52 (0.47-0.58) |
| Census Region 3: South | **2003** | 0.65 (0.59-0.71) |
| Census Region 3: South | **2004** | 0.80 (0.74-0.87) |
| Census Region 3: South | **2005** | 0.95 (0.88-1.02) |
| Census Region 3: South | **2006** | 1.04 (0.97-1.12) |
| Census Region 3: South | **2007** | 1.20 (1.12-1.28) |
| Census Region 3: South | **2008** | 1.23 (1.15-1.31) |
| Census Region 3: South | **2009** | 1.50 (1.41-1.58) |
| Census Region 3: South | **2010** | 1.62 (1.53-1.71) |
| Census Region 3: South | **2011** | 1.72 (1.63-1.81) |
| Census Region 3: South | **2012** | 1.87 (1.77-1.96) |
| Census Region 3: South | **2013** | 1.97 (1.88-2.07) |
| Census Region 3: South | **2014** | 2.03 (1.93-2.12) |
| Census Region 3: South | **2015** | 2.21 (2.11-2.31) |
| Census Region 3: South | **2016** | 2.44 (2.34-2.55) |
| Census Region 3: South | **2017** | 2.72 (2.62-2.83) |
| Census Region 3: South | **2018** | 2.82 (2.71-2.93) |
| Census Region 3: South | **2019** | 3.14 (3.03-3.26) |
| Census Region 3: South | **2020** | 4.20 (4.08-4.33) |
| Census Region 3: South | **2021** | 5.03 (4.89-5.18) |
| Census Region 3: South | **2022** | 4.73 (4.60-4.87) |
| Census Region 3: South | **2023** | 4.68 (4.55-4.81) |
| **Total (2000-2023)** |  | **2.67 (2.63-2.70)** |
| **Census Region 4: West** | **2000** | 0.44 (0.37-0.51) |
| Census Region 4: West | **2001** | 0.59 (0.52-0.67) |
| Census Region 4: West | **2002** | 0.60 (0.52-0.67) |
| Census Region 4: West | **2003** | 0.69 (0.61-0.77) |
| Census Region 4: West | **2004** | 0.76 (0.68-0.85) |
| Census Region 4: West | **2005** | 1.08 (0.98-1.18) |
| Census Region 4: West | **2006** | 1.17 (1.06-1.27) |
| Census Region 4: West | **2007** | 1.28 (1.18-1.39) |
| Census Region 4: West | **2008** | 1.40 (1.29-1.51) |
| Census Region 4: West | **2009** | 1.49 (1.38-1.60) |
| Census Region 4: West | **2010** | 1.72 (1.60-1.84) |
| Census Region 4: West | **2011** | 1.93 (1.80-2.05) |
| Census Region 4: West | **2012** | 1.95 (1.83-2.07) |
| Census Region 4: West | **2013** | 2.12 (1.99-2.25) |
| Census Region 4: West | **2014** | 2.23 (2.10-2.35) |
| Census Region 4: West | **2015** | 2.58 (2.44-2.71) |
| Census Region 4: West | **2016** | 2.75 (2.61-2.89) |
| Census Region 4: West | **2017** | 3.33 (3.18-3.48) |
| Census Region 4: West | **2018** | 3.42 (3.27-3.58) |
| Census Region 4: West | **2019** | 3.92 (3.75-4.08) |
| Census Region 4: West | **2020** | 4.92 (4.74-5.10) |
| Census Region 4: West | **2021** | 6.19 (5.99-6.39) |
| Census Region 4: West | **2022** | 6.18 (5.98-6.38) |
| Census Region 4: West | **2023** | 5.59 (5.41-5.78) |
| **Total (2000-2023)** |  | **3.24 (3.19-3.29)** |

**Supplementary Table 8.** Sleep apnea-related mortality in patients with Hypertention AAMR per 100,000 stratified by census region in the United States from 2000 to 2023.

| UCD - 15 Leading Causes of Death | Total Deaths (2000-2023) |
| --- | --- |
| Diseases of heart (I00-I09, I11, I13, I20-I51) | 31,299 |
| Diabetes mellitus (E10-E14) | 9,710 |
| Chronic lower respiratory diseases (J40-J47) | 8,563 |
| Malignant neoplasms (C00-C97) | 6,372 |
| Essential hypertension and hypertensive renal disease (I10, I12, I15) | 4,339 |

**Supplementary Table 9.** Sleep apnea-related mortality in patients with Hypertention per 100,000 stratified by top 3 underlying causes of death in the United States from 2000 to 2020.

| **Category** | **Interval of Years** | **APC (95% CI)** |
| --- | --- | --- |
| **Overall** | 1999–2018 | 9.15 (8.70 to 9.60) |
|  | 2018–2020 | 20.20 (14.28 to 26.43) |
| **Male** | 1999–2018 | 9.45 (8.87 to 10.02) |
|  | 2018–2020 | 19.93 (13.20 to 27.07) |
| **Female** | 1999–2018 | 8.10 (7.27 to 8.93) |
|  | 2018–2020 | 20.93 (12.77 to 29.69) |
| **Black or African American** | 1999–2018 | 11.71 (8.36 to 15.24) |
|  | 2018–2020 | -5.60 (-16.61 to -2.97) |
| **White** | 1999–2018 | 9.47 (8.82 to 10.13) |
|  | 2018–2020 | 20.35 (14.33 to 26.90) |
| **Hispanic or Latino** | 1999–2018 | 18.97 (4.09 to 36.38) |
|  | 2018–2020 | -11.80 (-29.37 to 0.20) |
| **Metropolitan** | 1999–2018 | 18.63 (16.13 to 20.67) |
|  | 2018–2020 | 21.32 (13.75 to 29.40) |
| **Non-Metropolitan** | 1999–2018 | 8.84 (7.95 to 9.72) |
|  | 2018–2020 | 23.37 (16.07 to 31.11) |
| **Northeast** | 1999–2018 | 21.21 (9.58 to 34.20) |
|  | 2018–2020 | -4.34 (-21.02 to 16.17) |
| **Midwest** | 1999–2018 | 21.73 (17.37 to 26.61) |
|  | 2018–2020 | -8.75 (6.29 to 10.24) |
| **South** | 1999–2018 | 14.57 (12.42 to 16.75) |
|  | 2018–2020 | 7.04 (3.43 to 5.84) |
| **West** | 1999–2018 | 9.12 (6.02 to 10.24) |
|  | 2018–2020 | 12.59 (11.80 to 34.32) |
| **Age 25–45** | 1999–2018 | 7.41 (6.44 to 8.40) |
|  | 2018–2020 | Data not available |
| **Age 45–65** | 1999–2018 | 6.75 (6.19 to 7.31) |
|  | 2018–2020 | 18.35 (10.61 to 26.62) |
| **Age 65–85+** | 1999–2018 | 10.64 (9.90 to 11.38) |
|  | 2018–2020 | 21.55 (15.37 to 28.06) |

**Supplementary Table 10**. Summary APCs of per 100,000 in the United States from 2000 to 2023 of people with Sleep apnea-related mortality in patients with Hypertention
